# Supplementary material
Source: PubMed Central journal article supplement (PMC4343108)

***Supplementary information for: Rate of language evolution is affected by population size.***

*Authors:* Lindell Bromham, Xia Hua, Thomas G. Fitzpatrick, Simon J. Greenhill

**Supplementary methods:**

Details of the models of language and population change

**Table S1:** Population data for each language included in this study.

**Table S2:** Comparisons of models of language evolution and likelihood ratio tests on the effect of population size on language evolution rates

**Table S3 :** Island area and rates of word gain and loss

**Figure S1:** Histograms of observed and expected numbers of changes (gains+losses)

**Figure S2:** Population size and number of identified loan words per language

**Figure S3:** Illustration of the two modes of language origin modelled

---

## SUPPLEMENTARY METHODS:

### Details of the models of language and population change

To implement Poisson regression, we make two assumptions. First, the gain or loss of words follows a Poisson process. Second, rates of gain or loss are linear functions of population size on log-log scales. As a result, the probability of observing  $S_1$  words gained or lost in a language and  $S_2$  words gained or lost in its sister language, since they split at time  $T$  back in history, is:

$$p(S_1, S_2) = e^{-\int_0^T [\lambda_1(t) + \lambda_2(t)] dt} \frac{[\int_0^T \lambda_1(t) dt]^{S_1} [\int_0^T \lambda_2(t) dt]^{S_2}}{(S_1)! (S_2)!} \quad \text{Eqn.1}$$

$\lambda_1(t)$  is the gain or loss rate of language 1 and equals  $e^{b \log(X_1(t)/X_0) + \lambda_0}$ , where  $X_1$  is the population size of language 1 at time  $t$ ,  $X_0$  is the population size of the common ancestor of the language pair and  $\lambda_0$  is its gain or loss rate,  $b$  measures the effect of population size on gain or loss rate. Since  $X_0$  and  $\lambda_0$  are unknown, they can be grouped into a single parameter, such that  $\lambda_1(t) = e^{b \log(X_1(t)) + a}$ . Similarly,  $\lambda_2(t) = e^{b \log(X_2(t)) + a}$ . We then estimate parameter  $b$  under models of language and population change that differ in four aspects as described below.

#### *Phylogenetic structure*

If language evolution is not phylogenetically structured, the relationship between language change and population size may be independent of the state of the common ancestor. In this case, we can treat changes in different languages as independent experiments on the same relationship between language change and population size, defined by the two parameters  $a$  and  $b$ . Otherwise, if, for example, an ancestral language evolves faster than others of the same population size and its descendent languages inherited the high rate of language changes, then the relationship between language change and population size in those descendent languages should have a larger intercept (parameter  $a$ ) than languages descending from other ancestors. We account for such a process of descent by fitting different intercepts of language evolving rates for different pairs of languages

### *Constant population size vs. growing population*

If each of the populations grows slowly following colonization of a new area, then we expect a long period in each language's history in which the historical population was much smaller than the current population. To account for this period of population growth, we model population growth in each language as a continuous density-dependent process with carrying capacity equal to its current population size, such that  $X_1(t) = \frac{X_1(T)}{1 + (\frac{X_1(T)}{N} - 1)e^{-rt}}$ , for which a common population growth rate ( $r$ ) and initial population size ( $N$ ) are fitted to all language pairs. Otherwise, if population grows rapidly to the carrying capacity of the inhabited area then stabilised, the current population size is a good approximation of population size at any time point.

### *Fission vs. colonization*

We account for different modes of the origination of a new language by using the archeological dates that most closely approximate the age of the split between two sister languages ( $T$  in equation 1). If the sister languages originated by splitting an ancestral population (Fission model in Figure S2), the older date of the establishment dates of the two languages should more accurately represent the age of the split ( $t_A$  in Figure S2). If a language is originated through colonization, where a founder population is established in a new area while the original population continues to occupy the original area (Colonization model in Figure S2), then the younger of the establishment dates of the two languages should more accurately estimate their age of the split ( $t_B$  in Figure S2).

### *Founder effect vs. gradual loss of words*

If the founding population of a language does not use all the lexemes from the ancestral language, there may be an initial loss of lexemes when the population is founded (i.e., founder effect). We model this sudden loss by introducing a new parameter  $S_f$  to describe the absolute number of words lost due to founder effect, such that if both languages were subject to founder effect since

they split (Fission model in Figure S2), equation 1 becomes:

$$p(S_1, S_2) = e^{-\int_0^T [\lambda_1(t) + \lambda_2(t)] dt} \frac{[\int_0^T \lambda_1(t) dt]^{S_1 - S_f} [\int_0^T \lambda_2(t) dt]^{S_2 - S_f}}{(S_1 - S_f)!(S_2 - S_f)!} \quad \text{If a language, say language 1, is derived}$$

from its sister language (Colonization model in Figure S2), only language 1 was subject to founder effect since the split of the two languages, then equation 1 becomes:

$$p(S_1, S_2) = e^{-\int_0^T [\lambda_1(t) + \lambda_2(t)] dt} \frac{[\int_0^T \lambda_1(t) dt]^{S_1 - S_f} [\int_0^T \lambda_2(t) dt]^{S_2}}{(S_1 - S_f)!(S_2)!}$$

We investigate all possible models that vary in the above four aspects. When accounting for phylogenetic structure in language evolution, we cannot estimate founder effect separately for each language pair due to constraints on degree of freedom. Thus, we assume equal number of words lost due to founder effect in all the language pairs. When accounting for phylogenetic structure and assuming constant population size over time, each different origination mode of a new language gives same fit to the data because the split age of a language pair becomes a part of the intercept to optimize. This fact allows us to use all the ten language pairs, including those whose establishment dates are not available.

**Table S1:** Population data for each language included in this study.

| Language        |                  | Population size |                     |                      | Area               | Age     |
|-----------------|------------------|-----------------|---------------------|----------------------|--------------------|---------|
| Name            | ISO <sup>†</sup> | Current (total) | Current (in area)   | Pre-contact          | (km <sup>2</sup> ) | (yr BP) |
| Anuta           | aud              | 270             | 270                 | 150                  | 0.4                | 500     |
| East Futuna     | fud              | 3600            | 3600                | 2000                 | 65                 | -       |
| East Uvea       | wls              | 10400           | 9620                | 4000                 | 59                 | -       |
| Emae            | mmw              | 400             | 400                 | -                    | 32                 | -       |
| Ifira-Mele      | mxe              | 3500            | 3500                | -                    | 1.5                | 400     |
| Kapingamarangi  | kpg              | 3000            | 1000                | -                    | 1.1                | 300     |
| Mangareva       | mrv              | 600             | -                   | 4000                 | 15                 | 970     |
| Marquesas       | mrq              | 6000            | 5390 <sup>i</sup>   | 35000                | 1057               | 855     |
| NZ Maori        | mri              | 60660           | 60000               | 115000               | 501776             | 891     |
| Nukuoro         | nkr              | 1000            | 730                 | 150                  | 1.7                | 500     |
| Penrhyn         | pnh              | 200             | 200                 | -                    | 9.84               | 730     |
| Rarotongan      | rar              | 39090           | 13100 <sup>ii</sup> | 15000 <sup>iii</sup> | 240                | 982     |
| Rennellese      | mnv              | 4390            | -                   | -                    | 60                 | 600     |
| Samoa           | smo              | 364257          | 199000              | 80000                | 3134               | 3062    |
| Sikaiana        | sky              | 730             | -                   | -                    | 2                  | 500     |
| Tahitian        | tah              | 68260           | 63000 <sup>ii</sup> | 45000                | 1536               | 982     |
| Takuu           | nho              | 1750            | -                   | -                    | 0.9                | -       |
| Tikopia         | tkp              | 3320            | -                   | 1250                 | 4.6                | 800     |
| Vaeakau-Taumako | piv              | 1660            | -                   | -                    | 15                 | 500     |
| West Futuna     | fut              | 1500            | -                   | -                    | 11                 | 1000    |

<sup>†</sup> The ISO-639-3 Language Identification Code (ISO) is a unique identifier assigned to each language under the International Organisation for Standardisation. Current population size estimates are from Ethnologue.com: where given, we report both the population within the area and the total estimated number of speakers, including immigrant communities. Dates of establishment from archaeological estimates are given in years before present (yr BP)

<sup>i</sup> includes speakers of the language residing within French Polynesia

<sup>ii</sup> includes speakers of the language residing within the Cook Islands

<sup>iii</sup> includes Penrhyn and Pukapuka

**Table S2.** Comparisons of models of language evolution and likelihood ratio tests on the effect of population size on language evolution rates. Values for each model are the negative log maximum likelihood ( $-\ln L$ ), number of parameters ( $k$ ), adjusted  $AIC$  for small sample size ( $AICc$ ), and the  $-\ln L$  of the corresponding null model that assumes no effect of population size on language evolution rates. Bold  $-\ln L$  values indicate a significant effect of population size after Bonferroni correction.  $AICc$  values in bold indicate the best-fitting model for each language evolution rate.

| Phylogenetic structure     | Population growth | Population divergence | Founder effect | $-\ln L$    | $k$         | $AICc$       | Null $-\ln L$ |
|----------------------------|-------------------|-----------------------|----------------|-------------|-------------|--------------|---------------|
| <b>Gain</b>                |                   |                       |                |             |             |              |               |
| Tip-wise                   | Constant          | Fission               | --             | 110.0       | 2           | 225.3        | 110.1         |
|                            |                   | Colonization          | --             | 125.4       | 2           | 256.1        | 126.2         |
| Pair-wise                  | Growth            | Fission               | --             | 107.3       | 4           | 228.3        | 110.1         |
|                            |                   | Colonization          | --             | 123.6       | 4           | 260.9        | 126.2         |
|                            | Constant          | --                    | --             | 81.6        | 7           | <b>205.2</b> | 85.6          |
|                            |                   | Growth                | Fission        | --          | 81.6        | 9            | 271.2         |
|                            |                   | Colonization          | --             | 81.7        | 9           | 271.4        | 85.6          |
| <b>Loss</b>                |                   |                       |                |             |             |              |               |
| Tip-wise                   | Constant          | Fission               | --             | 85.3        | 2           | 175.9        | 85.5          |
|                            |                   | Colonization          | --             | 86.7        | 2           | 178.7        | 91.2          |
| Pair-wise                  | Growth            | Fission               | --             | 79.1        | 4           | 171.9        | 85.5          |
|                            |                   | Colonization          | --             | 85.3        | 4           | 184.3        | 91.2          |
|                            | Constant          | Fission               | Multiple       | <b>54.5</b> | 8           | 173.0        | 72.1          |
|                            |                   | Colonization          | Multiple       | 50.9        | 8           | 165.8        | 51.1          |
| Pair-wise                  | Constant          | --                    | --             | <b>46.4</b> | 7           | <b>134.8</b> | 65.0          |
|                            |                   | Growth                | Fission        | --          | <b>46.5</b> | 9            | 201.0         |
|                            | Constant          | Colonization          | --             | <b>44.4</b> | 9           | 196.8        | 65.0          |
|                            |                   | Fission               | Single         | <b>46.4</b> | 8           | 156.8        | 65.0          |
|                            |                   | Colonization          | Single         | <b>37.4</b> | 8           | 138.8        | 60.0          |
| <b>Total (gain + loss)</b> |                   |                       |                |             |             |              |               |
| Tip-wise                   | Constant          | Fission               | --             | 113.9       | 2           | 233.1        | 114.0         |
|                            |                   | Colonization          | --             | 131.1       | 2           | 267.5        | 136.2         |
| Pair-wise                  | Growth            | Fission               | --             | 112.1       | 4           | 237.9        | 114.0         |
|                            |                   | Colonization          | --             | 134.6       | 4           | 282.9        | 136.2         |
|                            | Constant          | Fission               | Multiple       | <b>90.3</b> | 8           | 244.6        | 103.8         |
|                            |                   | Colonization          | Multiple       | 63.4        | 8           | 190.8        | 64.2          |
| Pair-wise                  | Constant          | --                    | --             | <b>70.6</b> | 7           | <b>183.2</b> | 78.5          |
|                            |                   | Growth                | Fission        | --          | 70.6        | 9            | 249.2         |
|                            | Constant          | Colonization          | --             | <b>69.6</b> | 9           | 247.2        | 78.5          |
|                            |                   | Fission               | Single         | <b>70.6</b> | 8           | 205.2        | 78.5          |
|                            |                   | Colonization          | Single         | <b>62.7</b> | 8           | 189.4        | 69.6          |

**Table S3:** The relationship between island area and rates of word gain and loss from Polynesian language pairs.

| Rate  | Mean        | s.e.  | 95 % CIs |        | $R^2$ | Likelihood<br>ratio |
|-------|-------------|-------|----------|--------|-------|---------------------|
|       |             |       | Upper    | Lower  |       |                     |
| Gain  | <b>0.26</b> | 0.039 | 0.351    | 0.174  | 0.333 | <b>53.1</b>         |
| Loss  | -0.01       | 0.017 | 0.033    | -0.044 | 0.001 | 0.1                 |
| Total | <b>0.05</b> | 0.015 | 0.081    | 0.012  | 0.079 | <b>9.2</b>          |

**Figure S1:** Histograms of observed and expected numbers of total change (gains plus losses) of cognates from basic vocabulary in 10 language pairs under the best-fitting model (phylogenetically structured, constant population size, no founder effects). Plotted distributions show the expected probability of having a certain number of changes (gains or losses) in each language. Vertical lines show the observed numbers of gains or losses in each language. The language with the larger speaker population size is colored blue while the language with smaller population size is colored red. There is no significant association between population size and total change (see Table 1).

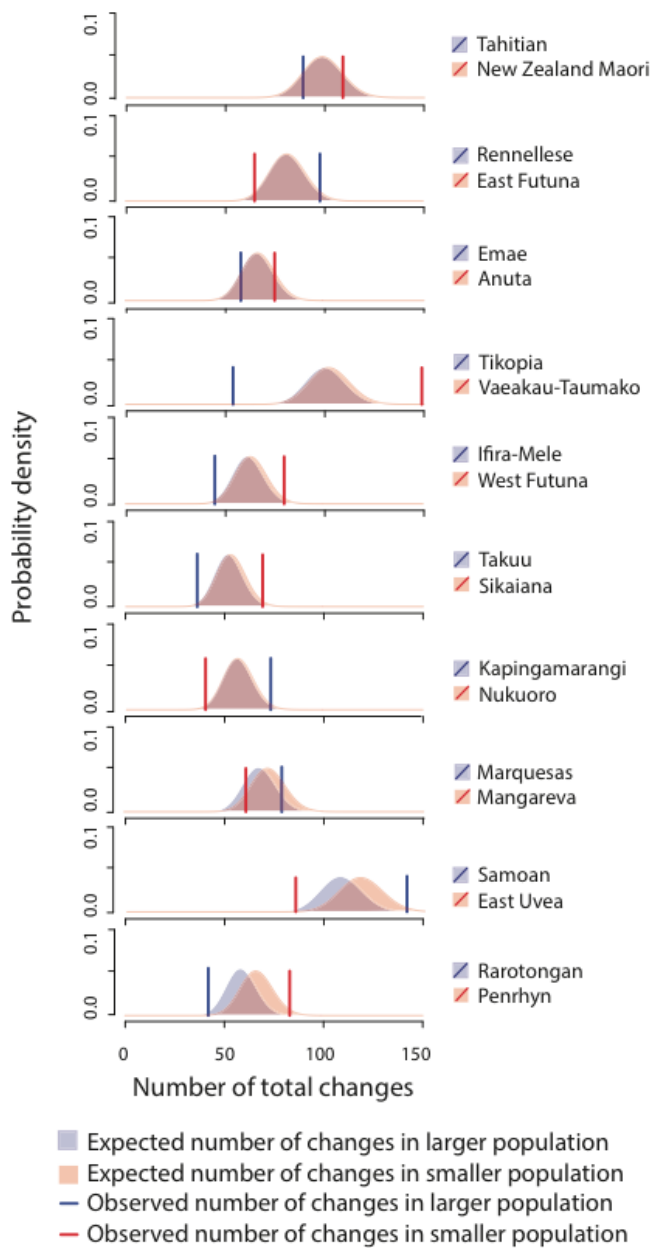



**Figure S2:** Log (ln) population size and number of loan words identified in the Austronesian Basic Vocabulary Database for the languages included in this study. There is no evidence of an association between population size and identified loan words, with or without the point on the extreme right of the graph (East Uvea, 10,400 speakers, 34 identified loan words in basic vocabulary).

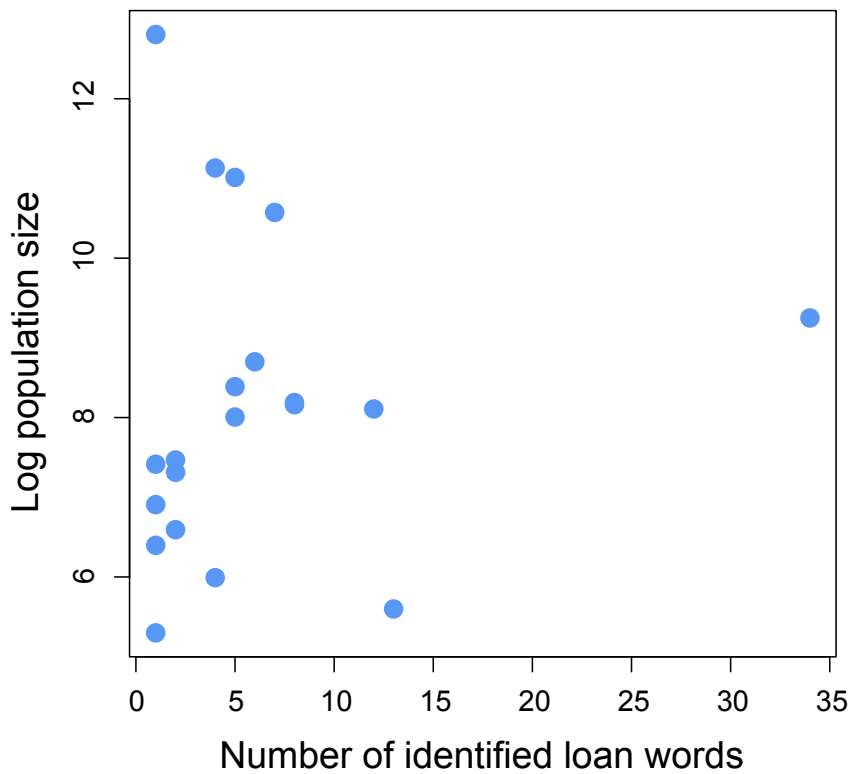

**Figure S3:** Illustration of the two modes of language origin modelled, and their relationship to the establishment dates of the two languages of the pair ( $t_A$  and  $t_B$ ). For the fission model, the older date ( $t_A$ ) provides the best estimate of date of divergence of the two languages in the pair. For the colonization model, the younger of the two dates ( $t_B$ ) is the most appropriate.

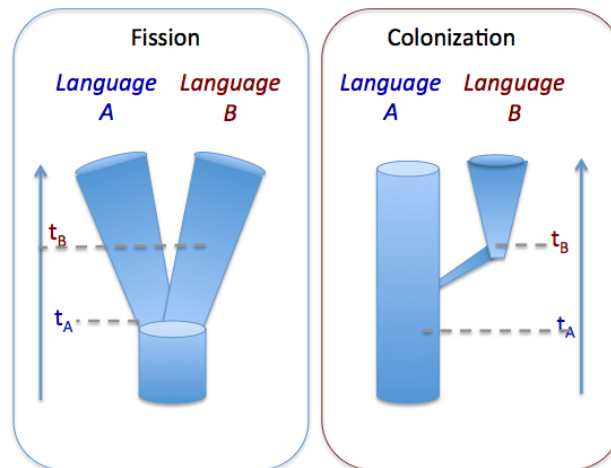

Supplement: pnas.1419704112.sapp.pdf [file pnas.1419704112.sapp.pdf]
